# Supplementary material
Source: publisher site journal article supplement (https://www.dovepress.com/article/406484)
Supplement: Supplementary file 1 [file get_supplementary_file.php]

Table S1 All mRNA as predicted by TargetScan and miRDB

|  | TargetScan | miRDB |
| --- | --- | --- |
| tiRNA-Glu-TTC-001 | A2BP1,AAK1,ABCG4,ACVR1B,AP2B1,ARF3,ARL3,ARL8B,ARR3,ARRDC3,ATP11B,ATP1B4,ATP8B1,AVPI1,BCL9,BTBD9,C12orf53,CBX1,CCDC86,CCDC88A,CCDC97,CD164,CD276,CHRDL1,CITED2,CLINT1,CLTC,COG3,CUL3,DCTN2,DDX54,DENND4C,DIRAS1,DIRAS2,EIF2S1,ELAVL2,ELL2,EPHA7,EVI5,FAM122A,FAM129A,FLJ12529,FLJ20309,FLJ45831,FOXP1,FZD5,G3BP2,GABRA4,GCC1,GFI1B,GLCE,GNAI3,GNB5,GRHL2,H3F3B,hCG_1757335,HIPK2,HMGA2,HNRNPH3,IGF2BP1,IKZF2,IPPK,JARID1A,JHDM1D,KIAA2022,KLF12,LGI1,LIMD1,LOC728957,LPGAT1,LPHN2,LYNX1,MACROD2,MAN2A2,MED10,MLL4,MMP15,MOBKL1A,MTCH2,MTMR9,MYO5B,NARG2,NIPBL,NMT2,NRXN2,PAM,PATL1,PCDH17,PCNX,PELI3,PHACTR2,PHC3,PHF19,PIGK,PIP3E,PITPNM1,PLAGL2,PLCB2,PLCB4,PLXNA4,PPP1R9A,PRCD,PTH2R,PTP4A1,PTPRD,PUNC,RANBP9,RAP1B,REEP4,RELT,SAMD12,SCD,SENP2,SFRS1,SFRS7,SH3PXD2A,SLC6A17,SMAD4,SMARCD2,SNF1LK2,SNRPD1,SPECC1L,STAG2,SURF4,SYT7,TEAD3,TESC,TET3,TEX13B,TGFBR2,THBS2,TLE3,TMED10,TMED9,TPM3,TRIM3,TUSC2,UBE2D3,UBL3,VAMP7,VASP,VAX1,WDR23,WDR81,WIPF2,WWC3,ZDHHC21,ZFP2,ZHX2,ZMYND10,ZNF10,ZNF136,ZNF14,ZNF181,ZNF182,ZNF221,ZNF253,ZNF260,ZNF266,ZNF271,ZNF30,ZNF302,ZNF318,ZNF343,ZNF37A,ZNF439,ZNF440,ZNF460,ZNF501,ZNF506,ZNF514,ZNF544,ZNF557,ZNF559,ZNF562,ZNF563,ZNF565,ZNF584,ZNF594,ZNF624,ZNF630,ZNF671,ZNF673,ZNF674,ZNF682,ZNF689,ZNF718,ZNF763,ZNF781,ZNF782,ZNF799,ZNF80,ZNF823(total:194) | AADAC,AAK1,ABCB11,ABCG4,ABI1,ABL2,ACADSB,ACTR2,ACVR2B,ADAM12,ADCY1,ADCYAP1R1,ADIPOR2,AGPAT1,AGPAT4,ALCAM,ALG10,ALG10B,ANKRD12,ANKRD33B,APP,ARF3,ARHGAP33,ARHGEF25,ARID2,ARID5B,ARL13B,ARL3,ARL8B,ARPC4-,TTLL3,ARRB2,ARRDC3,ATF2,ATG14,ATP8B1,ATP9A,ATXN1,AVPI1,AZGP1,BAZ2B,BCL9,BLOC1S4,BORA,BRK1,C10orf82,C11orf16,C18orf63,C1orf74,C2CD3,C3orf38,C5orf24,C7orf71,C8orf87,CAB39,CALCRL,CASD1,CBL,CCDC113,CCR6,CD164,CD1D,CD276,CD84,CD99,CDK13,CDK17,CDYL,CELSR1,CENPF,CEP57L1,CFAP161,CHD1,CHEK1,CHI3L2,CHORDC1,CHRDL1,CLDN14,CLEC5A,CLMP,CLTC,CNGB1,CNIH2,CNOT1,COBLL1,COG3,COX6C,CSE1L,CSNK2A1,CUL3,CXCL12,CYB561D1,CYP26B1,CYP2U1,DAGLA,DCAF17,DCAF6DCLRE1B,DCTN2,DDHD2DDX3X,DEDD2,DENND4C,DENND5B,DGKH,DHCR24,DIP2B,DKK2DNAI2,DNAJC14,DNAJC21,DNAJC27DNMT3A,DSTEEA1,EEF1AKMT2,ELAVL2,ELL2,ELP5,ENDOD1,ENTPD1,EPM2A,ERCC8,ETF1,EVI5,FABP4,FAM122A,FAM155A,FAM170B,FAM227A,FAM229B,FAM53B,FAM76A,FBXO17,FGF14,FGF5,FIGNL1,FKTN,FLT1,FRYL,FZD5,G3BP1,GAB1,GAB3,GALNT10,GATAD2A,GCC1,GIMAP6,GK5,GLCE,GLT1D1,GNAI3,GOLGA6L1,GOLGA6L6,GOSR1,GPX5,GRIA4,GRID2,GRIP2,GRK6,GSPT1,GZF1,HAS2,HCN1,HDAC8,HEG1,HIPK2,HLA,F,HLTF,HMBS,HNRNPH2,HOMER1,HPS1,HS3ST3B1,HSP90B1,HSPA14,IGDCC3,IGF1,IGF2BP1,IKZF2,ILKAP,INPP4A,INSYN2,IQGAP3,IQSEC2,IRS1,ITPRIP,JCAD,KCNIP1,KCNK10,KCNMB3,KCTD8,KLF12,KLHDC8B,KLHL12,KLHL29,KLRF1,KMO,KRBOX4,LAMB4,LETMD1,LGI1,LGR4,LIFR,LIMD1,LMTK2,LOC100130451,LOC101927844,LOC728485,LPP,LRP6,LRPAP1,LRRC27,LRRC6,LRRN2,LRRN4CL,LRSAM1,LYPD6,LZIC,LZTFL1,MACROD2,MAFG,MAFK,MAGT1,MAN2A1,MAP1LC3C,MAP2K1,MAP3K9,MAPK10,MAPK13,MARCO,MASP1,MBP,MED1,MED10,MEF2A,METTL15,MIA2,MLEC,MLXIP,MNT,MOB1B,MOSMO,,MSANTD4,MSL1,MTAP,MTMR1,MYO5A,NCAPG2,NCOA3,NCOA7,NCR3,NDFIP2,NDST3,NEDD9,NEXMIF,NFYB,NIPBL,NLGN4Y,NMBR,NOTCH3,NRN1,NRXN2,NSD2,NSL1,NTN1,NTRK1,NUP98,NXNL2,NXPH2,OAT,ORMDL3,OSBP,OXNAD1,PAFAH1B2,PAM,PAPOLA,PARP14,PATL2,PATZ1,PAX8PBX1,PCTP,PDE1C,PDE7A,PEA15,PEG3,PELI3,PHACTR2,PIANP,PIK3R3,PIP4K2C,PIP4P1,PLCB4,PLEKHG4B,PPIB,,PPP1R1A,PPP1R3B,PPP1R3F,PPP1R9A,PRAMEF1,PRCD,PRELID2,PRKACB,PRKAR2B,PRKD1,PRNP,PROX1,PRPF38B,PSIP1,PSMC4,PTBP2,PTGER2,PTH2R,PTP4A1,PTPN12,PTPN4,PTPRD,PTPRT,RAB22A,RAB26,RAB30,RAB3C,RALGPS1,RAN,RAP1B,RBFOX1,RBM5,RBPJ,RCOR3,REPS2,RFK,RFX4,RGL2,RGS16,RMND5A,RNF145,RNF150,RNF168,RNF180,RNF187,RNF217,RPP25L,RPS6KA6,RPUSD4,RRM2,RSU1,RTN3,RTP1,RYBP,RYR2,SAMD12,SAP30L,SAR1A,SBDS,SCD,SEC23IP,SENP2,SETDB2,SH2B3,SIK2,SIRT1,SLC12A3,SLC15A2,SLC22A24,SLC22A3,SLC35E3,SLC9B2,SLITRK4,SLK,SMAP2,SMARCA2,SMARCD2,SMPDL3A,SNRPD1,SNX11,SNX24,SORBS2,SPECC1L,SPIN3,SRSF1,SRSF7,SSBP2,STAB1,STAG2,STARD4,STK26,STK35,STK38,STT3A,STUM,SUPT3H,SURF4,SV2C,SYNCRIP,SYNDIG1L,SYT13,TANC1,TAPBP,TARDBP,TARS,TBC1D16,TBCK,TENM3,TENM4,TENT5A,TET1,TFCP2L1,TFDP1,THEMIS2,THSD7A,TIMM17A,TMED10,TMEM127,TMEM35A,TMOD3,TMPO,TP63,TRAPPC10,TRH,TRIM13,TRIM3,TRIM5,TRIM71,TRPC3,TSPAN14,TTC17,TTC33,TTL,TTLL3,TUSC2,UBE2D3,UBE2V2,UBL3,UBXN7,USP27X,USP7,VAMP1,VAV2,VPS26B,VSTM2A,WBP11,WDFY3,WDR36,WWC3,XPR1,YARS,YIPF6,ZADH2,ZC3H12C,ZFP1,ZFP30,ZFP36L2,ZFP90,ZFX,ZHX2,ZNF124,ZNF135,ZNF14,ZNF175,ZNF180,ZNF181,ZNF189,ZNF195,ZNF208,ZNF253,ZNF26,ZNF260,ZNF268,ZNF302,ZNF304,ZNF337,ZNF343,ZNF367,ZNF37A,ZNF426,ZNF439,ZNF440,ZNF441,ZNF443,ZNF460,ZNF506,ZNF514,ZNF516,ZNF530,ZNF543,ZNF544,ZNF551,ZNF559,ZNF559,ZNF177,ZNF563,ZNF565,ZNF569,ZNF584,ZNF586,ZNF589,ZNF594,ZNF596,ZNF624,ZNF674,ZNF676,ZNF682,ZNF700,ZNF705A,ZNF705D,ZNF705E,ZNF711,ZNF718,ZNF728,ZNF732,ZNF736,ZNF74,ZNF747,ZNF75A,ZNF763,ZNF773,ZNF780A,ZNF780B,ZNF781,ZNF799,ZNF80,ZNF804A,ZNF814ZNF829,ZNF844,ZNF850,ZNF90,ZSCAN16,ZSCAN22,ZWINT,ZYG11B(total:530) |
| tiRNA-Lys-CTT-003 | ADRA1B,ALDH1A2,ATP8B2,FBXL11,FBXL19,GMDS,GRIN2D,JMJD3,LRFN1,MED1,MLL2,NTN1,OLIG3,PRDM16,SLC2A1,SYNGAP1,TNRC6B,ZFHX3,ZIC3,ZNF148,ZNF385A(total:22) | AARS2,ADRA1B,ALKBH4,AP1S3,AP5B1,BICRA,BIVM,CADM3,CAMK1D,CAPN5,CASP10,CCDC9B,CDH23,CDK11A,CDK11B,CDT1,CERK,CLCN6,CROT,CYB5R3,DHTKD1,DMPK,DPP9,EBF1,EDAR,EFNA3,FAM160A1,FBXL13,FBXL19,FSD2,GADD45A,GINS4,GMEB1,GTSE1,HERPUD2,HIF3A,HINT3,IL2RA,JHY,KCMF1,KCNA7,KCTD2,KIF1C,LAIR1,LRFN1,MAFA,MAFB,MBOAT1,MFRP,MGAT5B,MRGBP,MRPL57,MTMR9,MTRNR2L5,NDUFA4,NR3C2,NUDC,OPA3,ORAI2,P3H4,PAK3,PANK2,PCGF3,PCLAF,PGM2L1,PIWIL2,PPM1G,PRR11,RAB40C,RBL1,RGS10,RSPH1,SARM1,SLC28A2,SLC4A5,SLC6A12,SMIM25,SPC24,STX11,SYNRGTFDP2,TMEM14B,TMEM25,TMEM45B,TTF1,VPS33B,ZBTB8A,ZFHX3,ZNF385A,ZNF491,ZNF543,ZNF718,ZNF761,ZNF91(total:94) |
| tRF-Ser-TGA-007 | ADRBK1,BCL11A,C10orf132,CADM3,DAB2IP,EGR3,FAM43B,IHPK1,LRP3,NCOR2,,NFIB,NFIX,total,ZNF609(total:14) | ACVR2B,BRPF3,CADM3,CHST9,CRP,DMPK,FMN1,FNBP1L,GABRR2,GPI,KANSL3,LRG1,MCOLN1,MNDA,NCOR2,NR5A1,PLOD2,PTPN1,RIMKLB,SCARB1,SLC12A6,SMIM15,SNX20,SOCS6,SPI1,TAGLN,YWHAG(total:27) |
